# Supplementary material for: Machine Learning Uncovers Food- and Excipient-Drug Interactions
Source: PubMed Central journal article supplement (PMC7179333; doi:10.1016/j.celrep.2020.02.094), 2020-03-17
Supplement: NIHMS1578467-supplement-1.pdf [file NIHMS1578467-supplement-1.pdf]

**Cell Reports, Volume 30**

## **Supplemental Information**

### **Machine Learning Uncovers**

### **Food- and Excipient-Drug Interactions**

**Daniel Reker, Yunhua Shi, Ameya R. Kirtane, Kaitlyn Hess, Grace J. Zhong, Evan Crane, Chih-Hsin Lin, Robert Langer, and Giovanni Traverso**

**Supplementary Table 5.** Related to Figure 2. Measured UGT2B7 activity for three additional GRAS/IIG compounds at 50  $\mu$ M testing concentration.

| <b>Compound</b> | <b>% UGT2B7 activity</b> |
|-----------------|--------------------------|
| Ursodiol        | 91 $\pm$ 2%              |
| Alpha-terpineol | 92 $\pm$ 3%              |
| Menthol         | 94 $\pm$ 4%              |
